# Supplementary material for: Dehydrogenative coupling promoted by copper catalysts: a way to optimise and upgrade bio-alcohols
Source: Royal Society of Chemistry journal article supplement (doi:10.1039/c6cy02670b), 2017-01-01
Supplement: c6cy02670b1.pdf [file c6cy02670b1.pdf]

**Supporting Information:**

**Dehydrogenative coupling promoted by copper catalysts: a way to optimise and upgrade bio-alcohols**

Nicola Scotti,<sup>a</sup> Federica Zaccheria,<sup>a</sup> Claudio Evangelisti,<sup>a</sup> Rinaldo Psaro<sup>a</sup> and Nicoletta Ravasio<sup>a\*</sup>

<sup>a</sup>. CNR Institute of Molecular Sciences and Technology, Via Golgi 19, 20133 Milano, Italy, Phone +39 0250314382;

\* Corresponding author, email: [n.ravasio@istm.cnr.it](mailto:n.ravasio@istm.cnr.it)

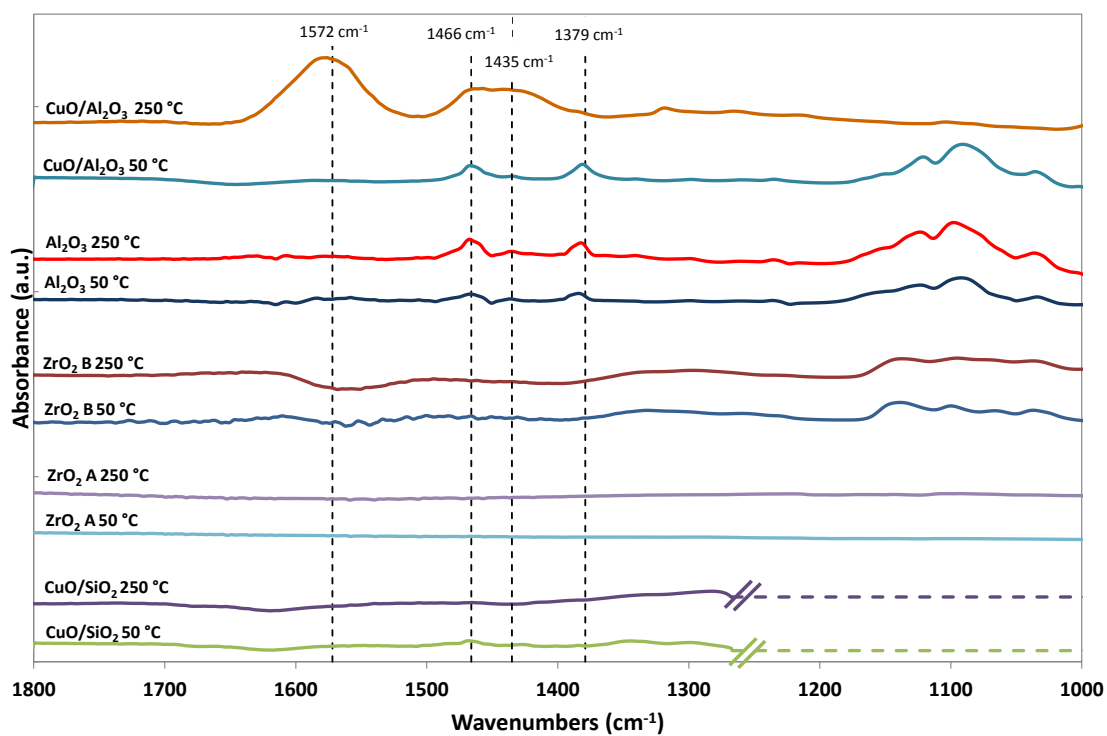

Figure S1. FT-IR of adsorbed 1-butanol over different catalysts and supports

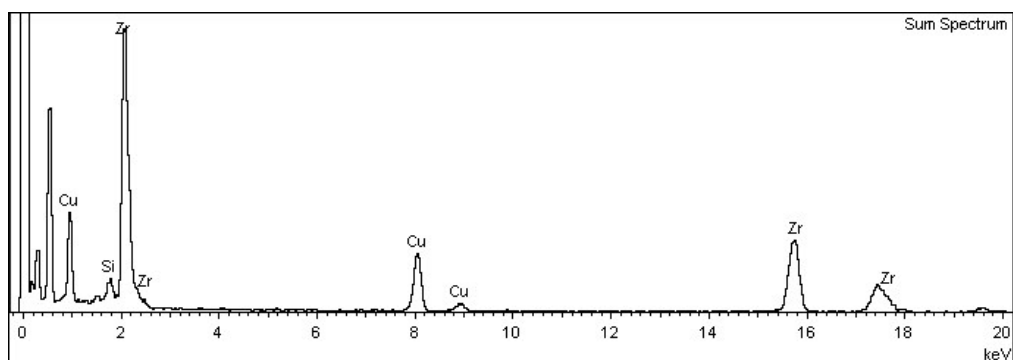

| Element | Atomic % | Wt % |
|---------|----------|------|
| Cu      | 19.3     | 11.2 |
| Si      | 8.1      | 2.1  |
| Zr      | 72.6     | 60.5 |

| PM               |      | PA |      | Atomic % |       | wt TOT           |       | wt%              |       |   | wt% |      |
|------------------|------|----|------|----------|-------|------------------|-------|------------------|-------|---|-----|------|
| SiO <sub>2</sub> | 60   | Si | 28.1 | Si       | 8.1   | SiO <sub>2</sub> | 4.9   | SiO <sub>2</sub> | 4.4%  | → | Si  | 2.1  |
| ZrO <sub>2</sub> | 123  | Zr | 91.2 | Zr       | 72.6  | ZrO <sub>2</sub> | 89.3  | ZrO <sub>2</sub> | 81.6% | → | Zr  | 60.5 |
| CuO              | 79,5 | Cu | 63.5 | Cu       | 19.3  | CuO              | 15.3  | CuO              | 14.0% | → | Cu  | 11.2 |
|                  |      |    |      | TOT      | 100.0 | wt tot           | 109.5 |                  |       |   |     |      |

**Figure S2.** EDX spectrum of the CuO/ZrO<sub>2</sub> C grain represented in Figure 3. In the tables are reported the Cu, Zr and Si atomic and weight composition and the calculation from atomic% to wt%.

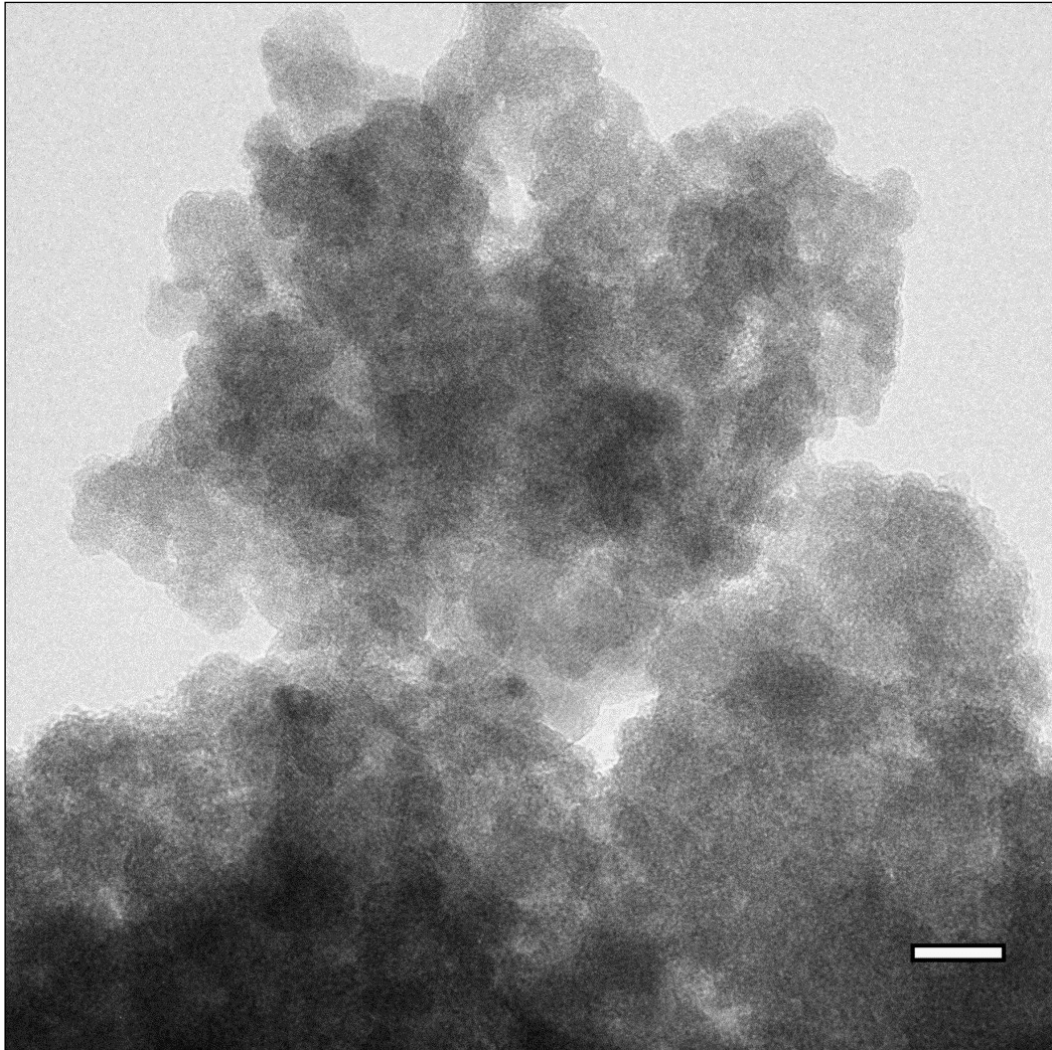

**Figure S3.** HRTEM micrograph of CuO/ZrO<sub>2</sub> C catalyst.

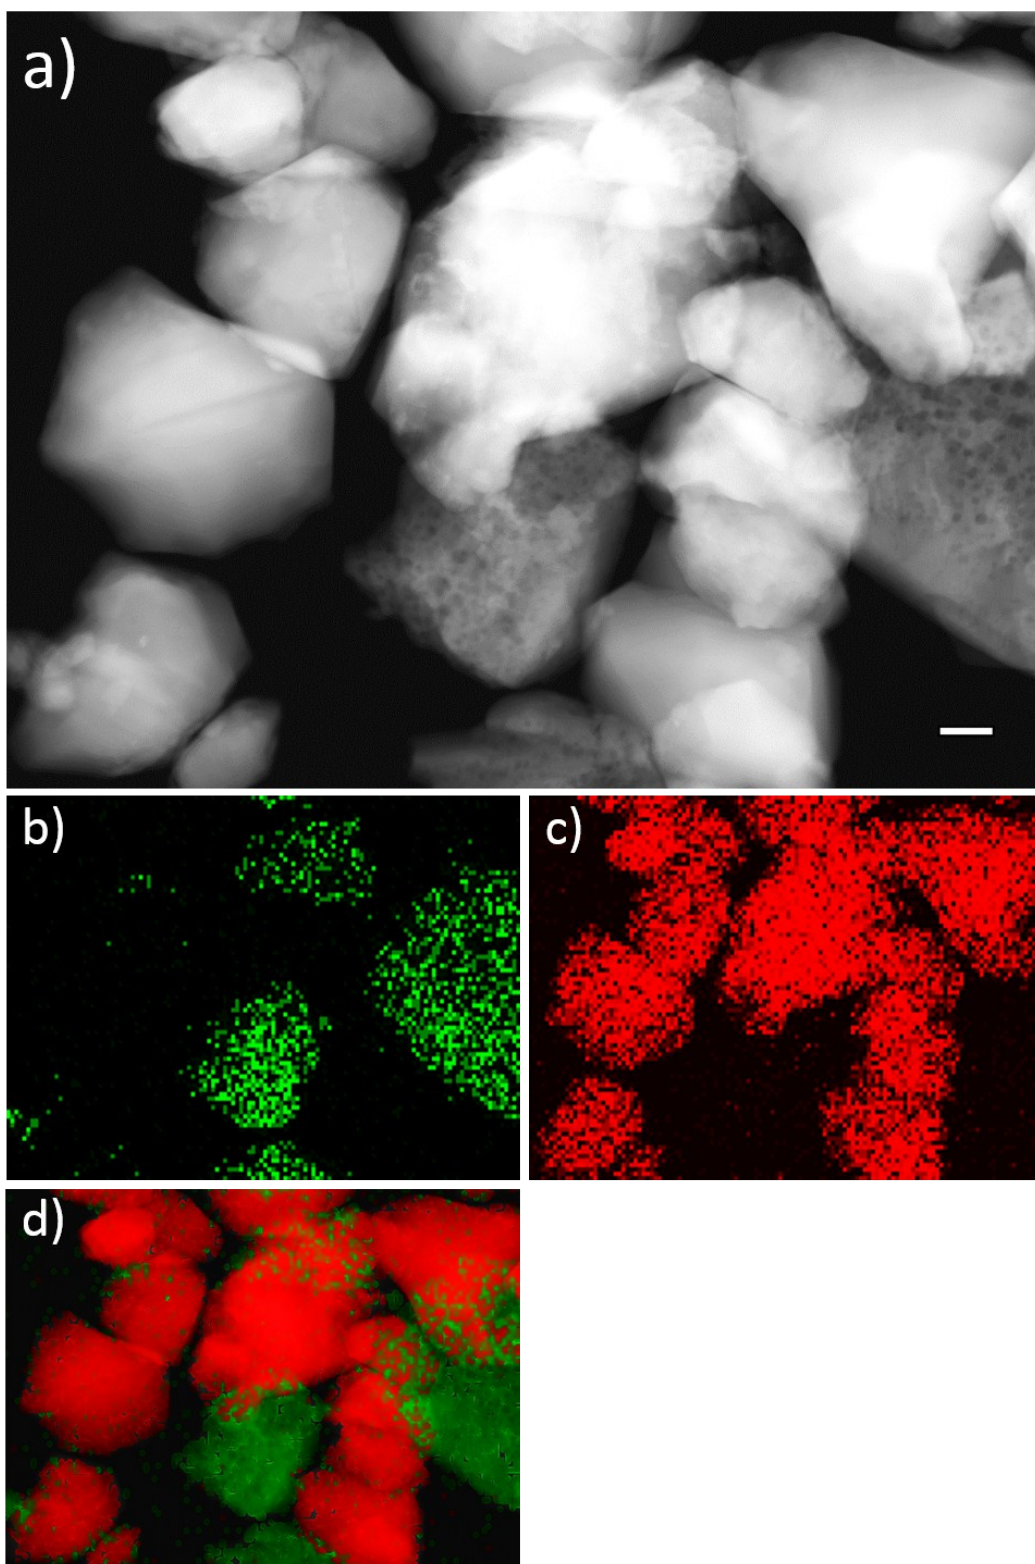

**Figure S4.** STEM measurements of CuO/ZrO<sub>2</sub>. A: a) HAADF image of a catalyst grain (the length of the bar corresponds to 50 nm); b-d) STEM-EDX mapping of the catalyst showing the copper dispersion present in the catalyst: b) copper map (green), c) zirconium map (red), d) overlay of copper (green) and zirconium (red) maps.

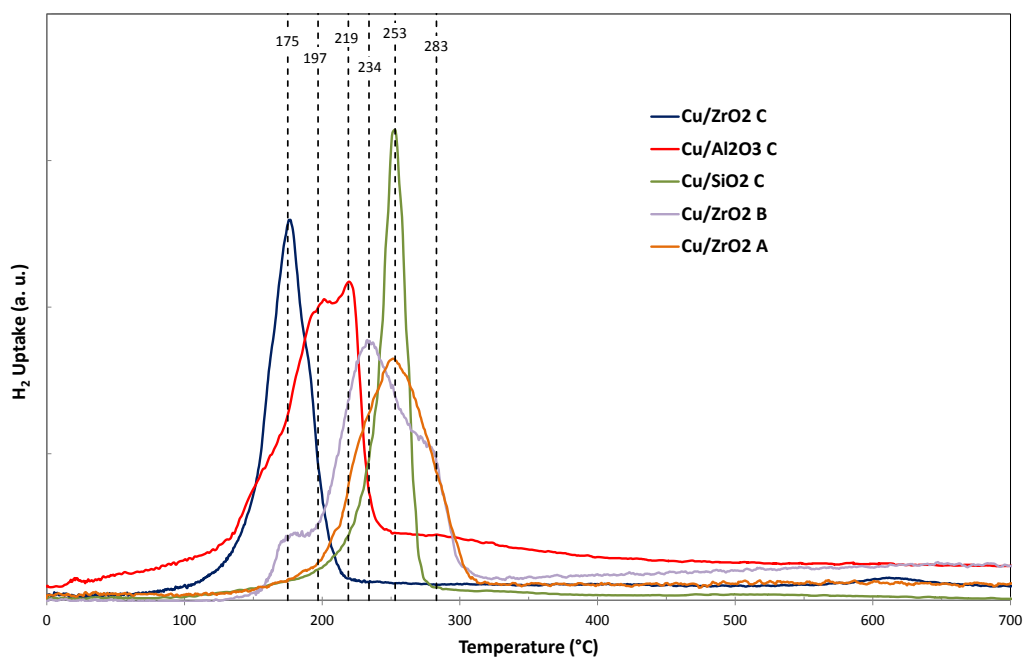

**Figure S5.**TPR analysis of CuO/ZrO<sub>2</sub> C, CuO/ZrO<sub>2</sub>B, CuO/ZrO<sub>2</sub> A, CuO/Al<sub>2</sub>O<sub>3</sub> and CuO/SiO<sub>2</sub>

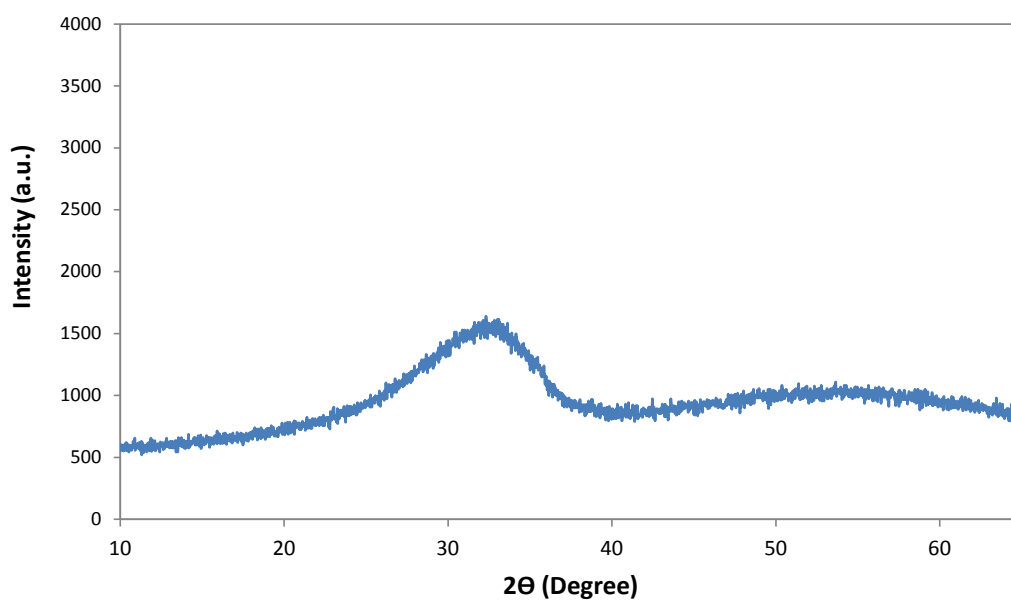

**Figure S6.** XRD of CuO/ZrO<sub>2</sub> C

Figure S5 shows the XRD pattern for the CuO/ZrO<sub>2</sub> C catalyst. No reflections for the CuO were detected, indicating the high dispersion of the copper phase, while the broad peak is typical of amorphous materials (in the present case the ZrO<sub>2</sub> C phase).

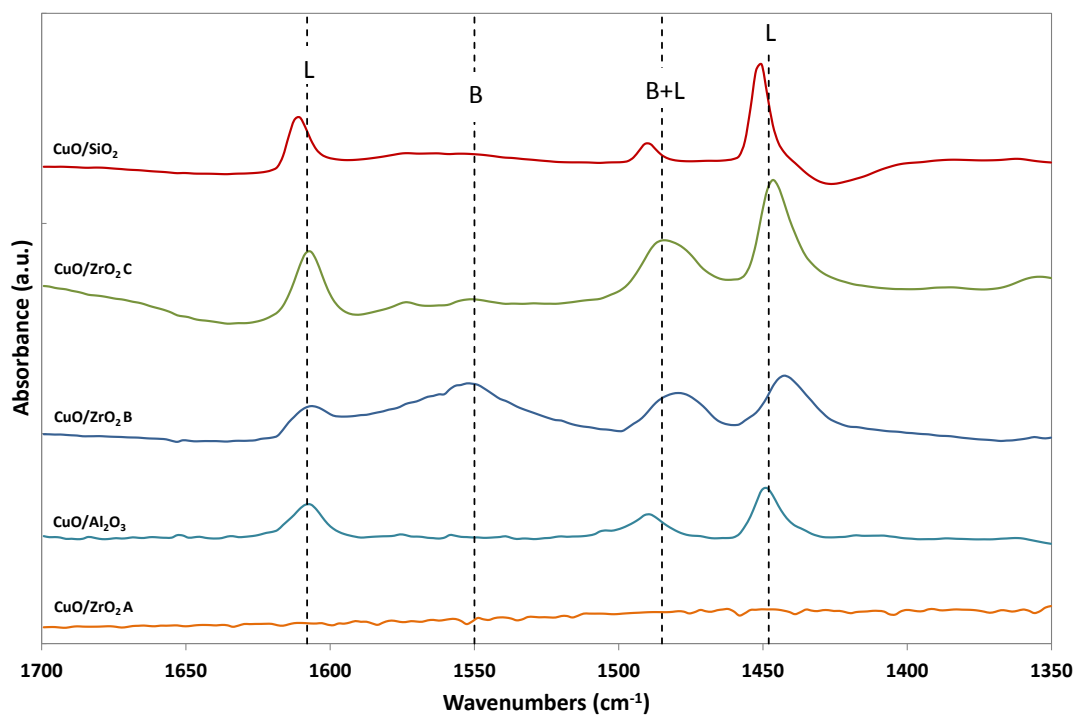

**Figure S7.** FT-IR of pyridine over different catalysts after degassing at 150 °C

The FT-IR spectrum of pyridine after degassing at 150 °C (Figure S6) shows three main bands at 1446, 1607 and 1485  $\text{cm}^{-1}$ , that are in agreement with the presence of Lewis acid sites. For zirconia-based materials the band at 1446  $\text{cm}^{-1}$  lies at relative low wavenumbers, very close to the one usually assigned to physisorbed or hydrogen bonded pyridine, but its resistance to outgassing up to 250 °C (together with the bands at 1607 and 1485  $\text{cm}^{-1}$ ) indicate unambiguously a Lewis acid-base interaction with pyridine. In the case of CuO/ZrO<sub>2</sub> C (very weak) and B a broad band at around 1450  $\text{cm}^{-1}$  is typical of the presence of Brønsted acid sites.

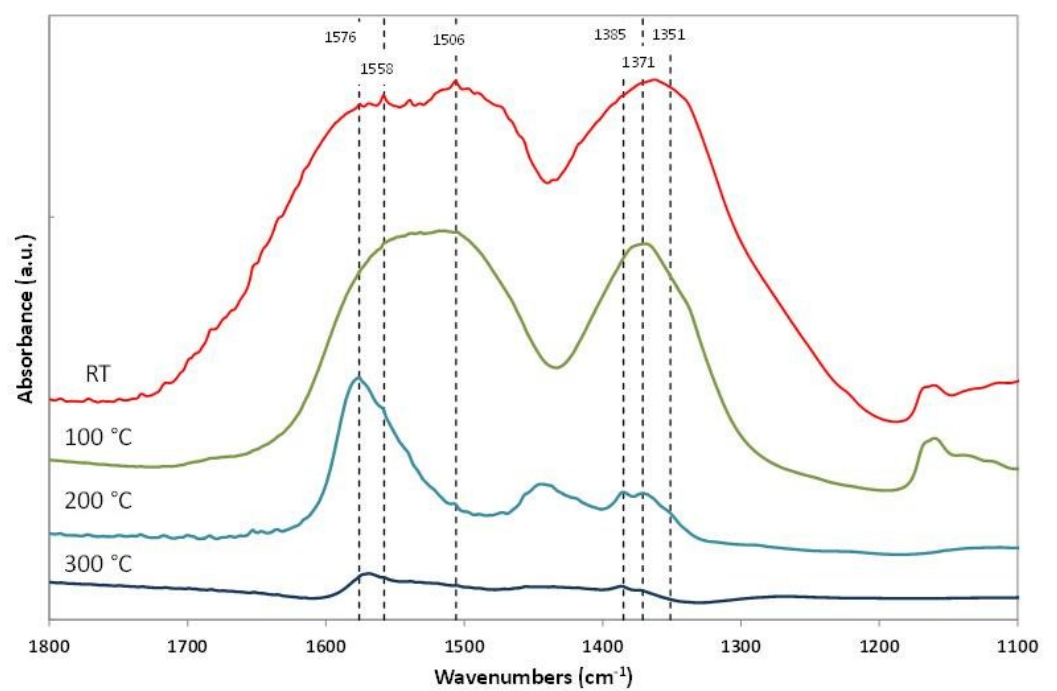

**Figure S8.** FT-IR of adsorbed CO<sub>2</sub> over CuO/ZrO<sub>2</sub> C

After CO<sub>2</sub> adsorption at RT we obtain a very broad spectrum (Figure S7). After degassing at increasing temperature, three maxima at 1558, 1506 and 1371 cm<sup>-1</sup> are detectable that could be due to bicarbonates and carbonates species mainly formed on basic hydroxyl group [69] while two peaks at 1576 and 1351 cm<sup>-1</sup>, with a spectral gap of 225 cm<sup>-1</sup> are diagnostic for bidentate carbonate species on coordinatively unsaturated acid-base pair centers. The bands at 1385 and 1371 cm<sup>-1</sup>, together to the one at 1576 cm<sup>-1</sup>, are also indicative for the presence of coordinatively unsaturated O<sup>2-</sup> centres characterized by high basicity [69, 70]. Therefore the CO<sub>2</sub> adsorption revealed the presence of superficial strongly basic centres and acid-base pairs.

For comparison the spectrum of ZrO<sub>2</sub> C is reported. After evacuation in ultra-high vacuum at 350 °C for one night the material already shows bands due to high-resistant species arising from the contact with atmospheric CO<sub>2</sub> (Figure S8). After CO<sub>2</sub> adsorption and desorption at increasing temperature spectra do not change significantly.



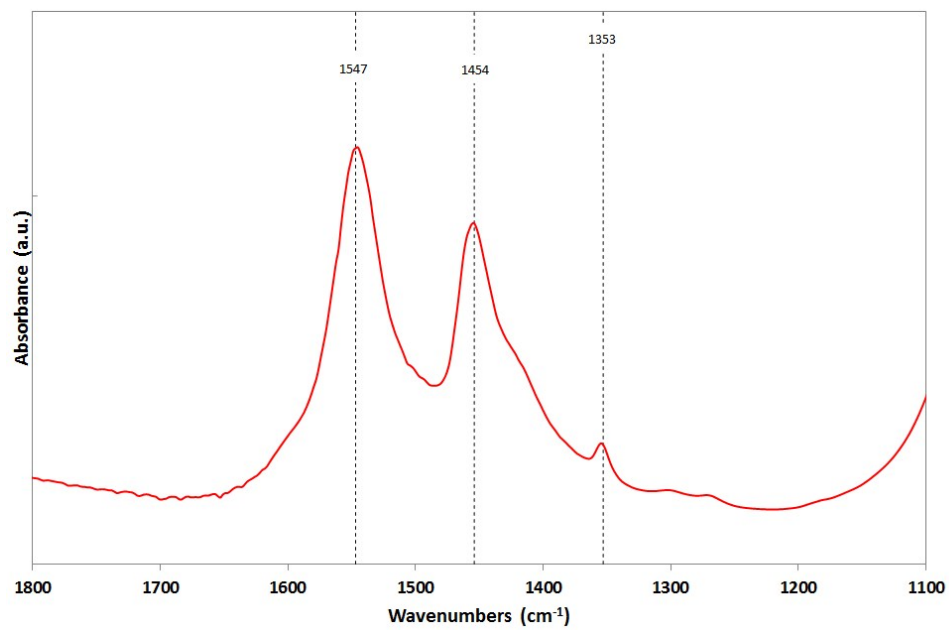

Figure S9. FT-IR of adsorbed CO<sub>2</sub> over ZrO<sub>2</sub> C

## Experimental details

All the experiments were performed in duplicate and in triplicate for the best results obtained (that is for experiments 4 and 5 in Table 1 and for the experiments 1 and 6 in Table 2).

### Quantitative analysis

**Conversion** of butanol and **yield** of butylbutanoate were evaluated by GC analysis by using hexadecane as internal standard according to the following formulas:

$$\text{Conv \%} = \left( \frac{\text{Mol butanol } i - \text{mol butanol } f}{\text{mol butanol } i} \right) \times 100$$

$$\text{Mol Butanol } f = \left[ \left( \frac{A \text{ butanol}}{A \text{ std}} - b \right) / a \right] \times \text{Mol std}$$

$$Y \% = \left[ \frac{\text{Mol butylbutanoate } f}{\text{Mol butanol}/2} \times 100 \right]$$

$$\text{Mol Butylbutanoate} = \left[ \left( \frac{A \text{ butylbutanoate}}{A \text{ std}} - b \right) / a \right] \times \text{Mol st}$$

with  $a$  and  $b$  drawn by the calibration curve.

The **amount of hydrogen** produced has been calculated as follows:

*Starting mol of butanol = 0,17 mol*

*Autoclave dead volume = 100 mL*

*H<sub>2</sub> pressure produced during reaction = 15 atm*

$$\text{mol H}_2 \text{ produced} = \frac{15 \text{ atm} \times 0,1 \text{ L}}{0,082 \left( \frac{\text{atm L}}{\text{mol K}} \right) 298 \text{ K}} = 0,061 \text{ mol}$$

*Theoretical mol of H<sub>2</sub> at 40% conv = 0,17 mol × 0,40 = 0,068 mol*

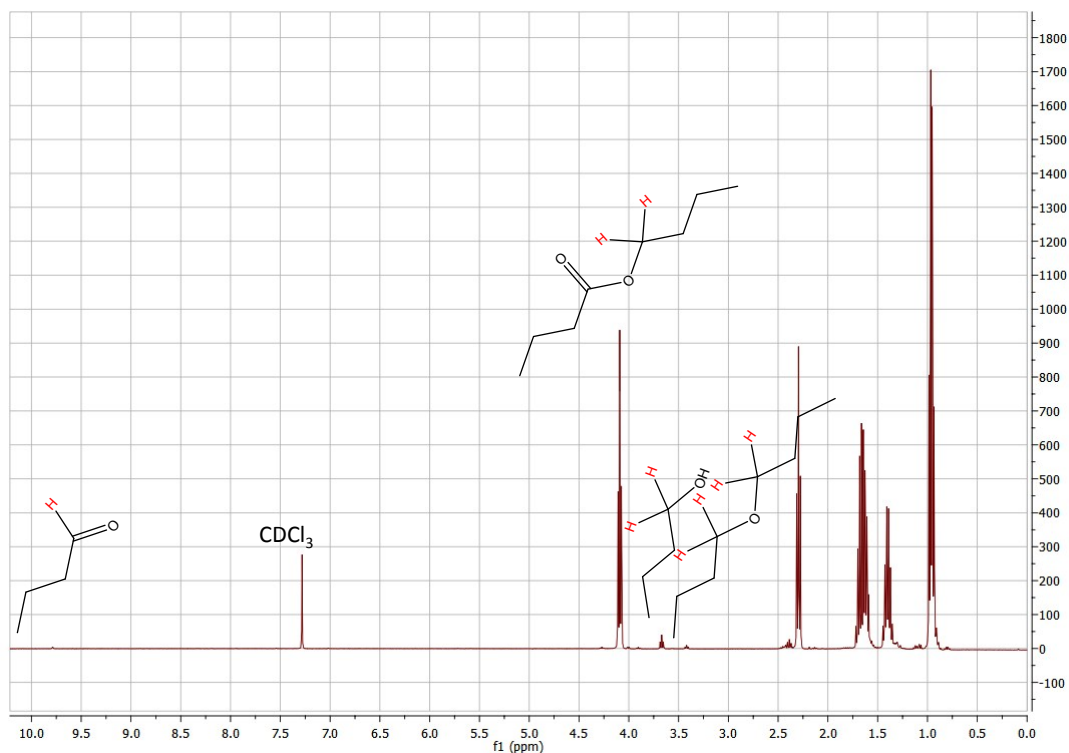

**Figure S10.** <sup>1</sup>H NMR analysis of reaction mixture obtained from 1-butanol over CuO/ZrO<sub>2</sub> C after 24 h

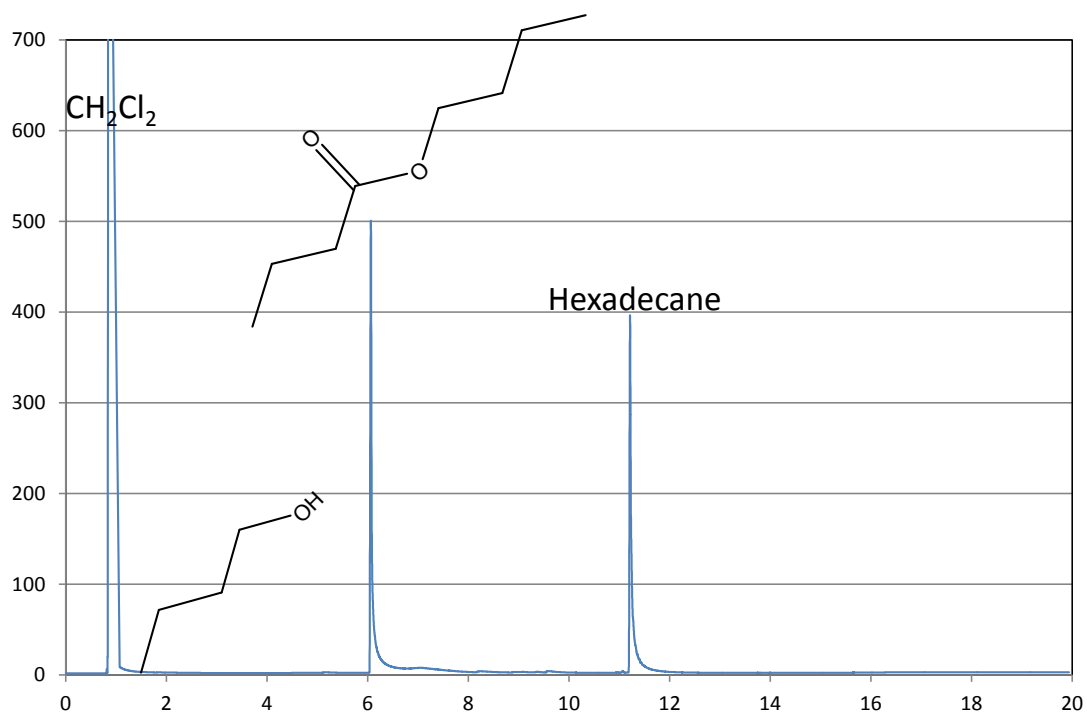

**Figure S11.** GC-FID analysis of reaction mixture obtained from 1-butanol over CuO/ZrO<sub>2</sub> C after 24 h
